# Supplementary material
Source: PubMed Central journal article supplement (PMC10026943)
Supplement: NIHMS1871881-supplement-MMC1.pdf [file NIHMS1871881-supplement-MMC1.pdf]

**Molecular Cell, Volume 83**

**Supplemental information**

**Structural snapshots of R-loop formation**

**by a type I-C CRISPR Cascade**

**Roisin E. O'Brien, Jack P.K. Bravo, Delisa Ramos, Grace N. Hibshman, Jacquelyn T. Wright, and David W. Taylor**

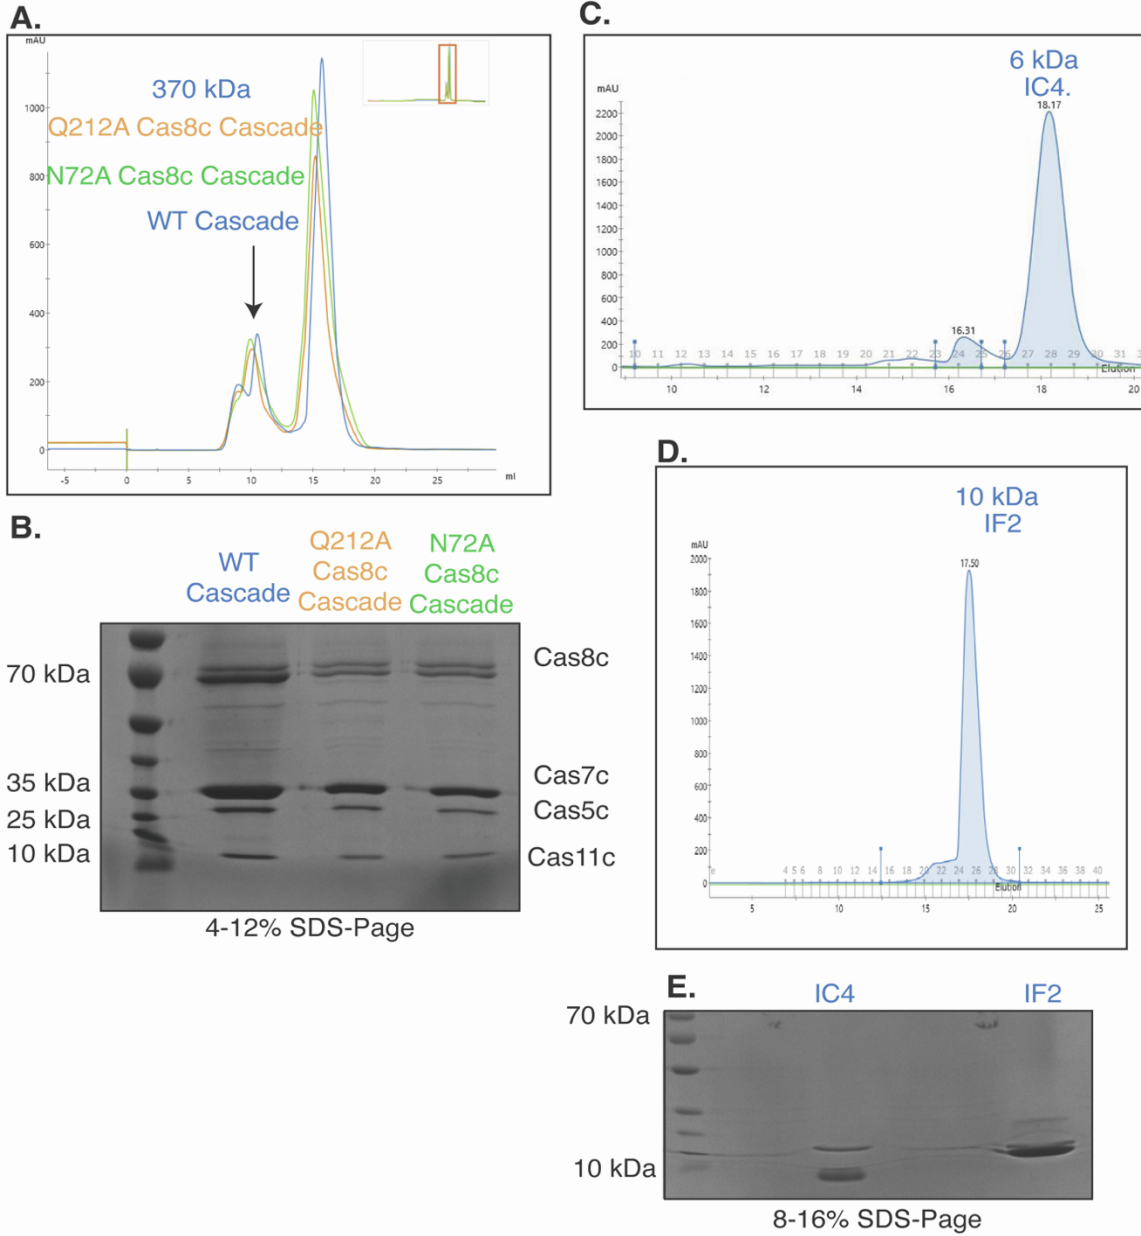

**Figure S1. Related to Figures 1-5. Purification of the type I-C Cascade Cas8c mutant Cascade, AcrIF2 and AcrIC4. A,B.** Size-exclusion chromatograph and SDS-Page analysis of WT, Cas8c-Q212A, and Cas8c-N72A Cascade. **C-E.** Size-exclusion chromatograph (C) and SDS-Page analysis of AcrIF2 and AcrIC4.

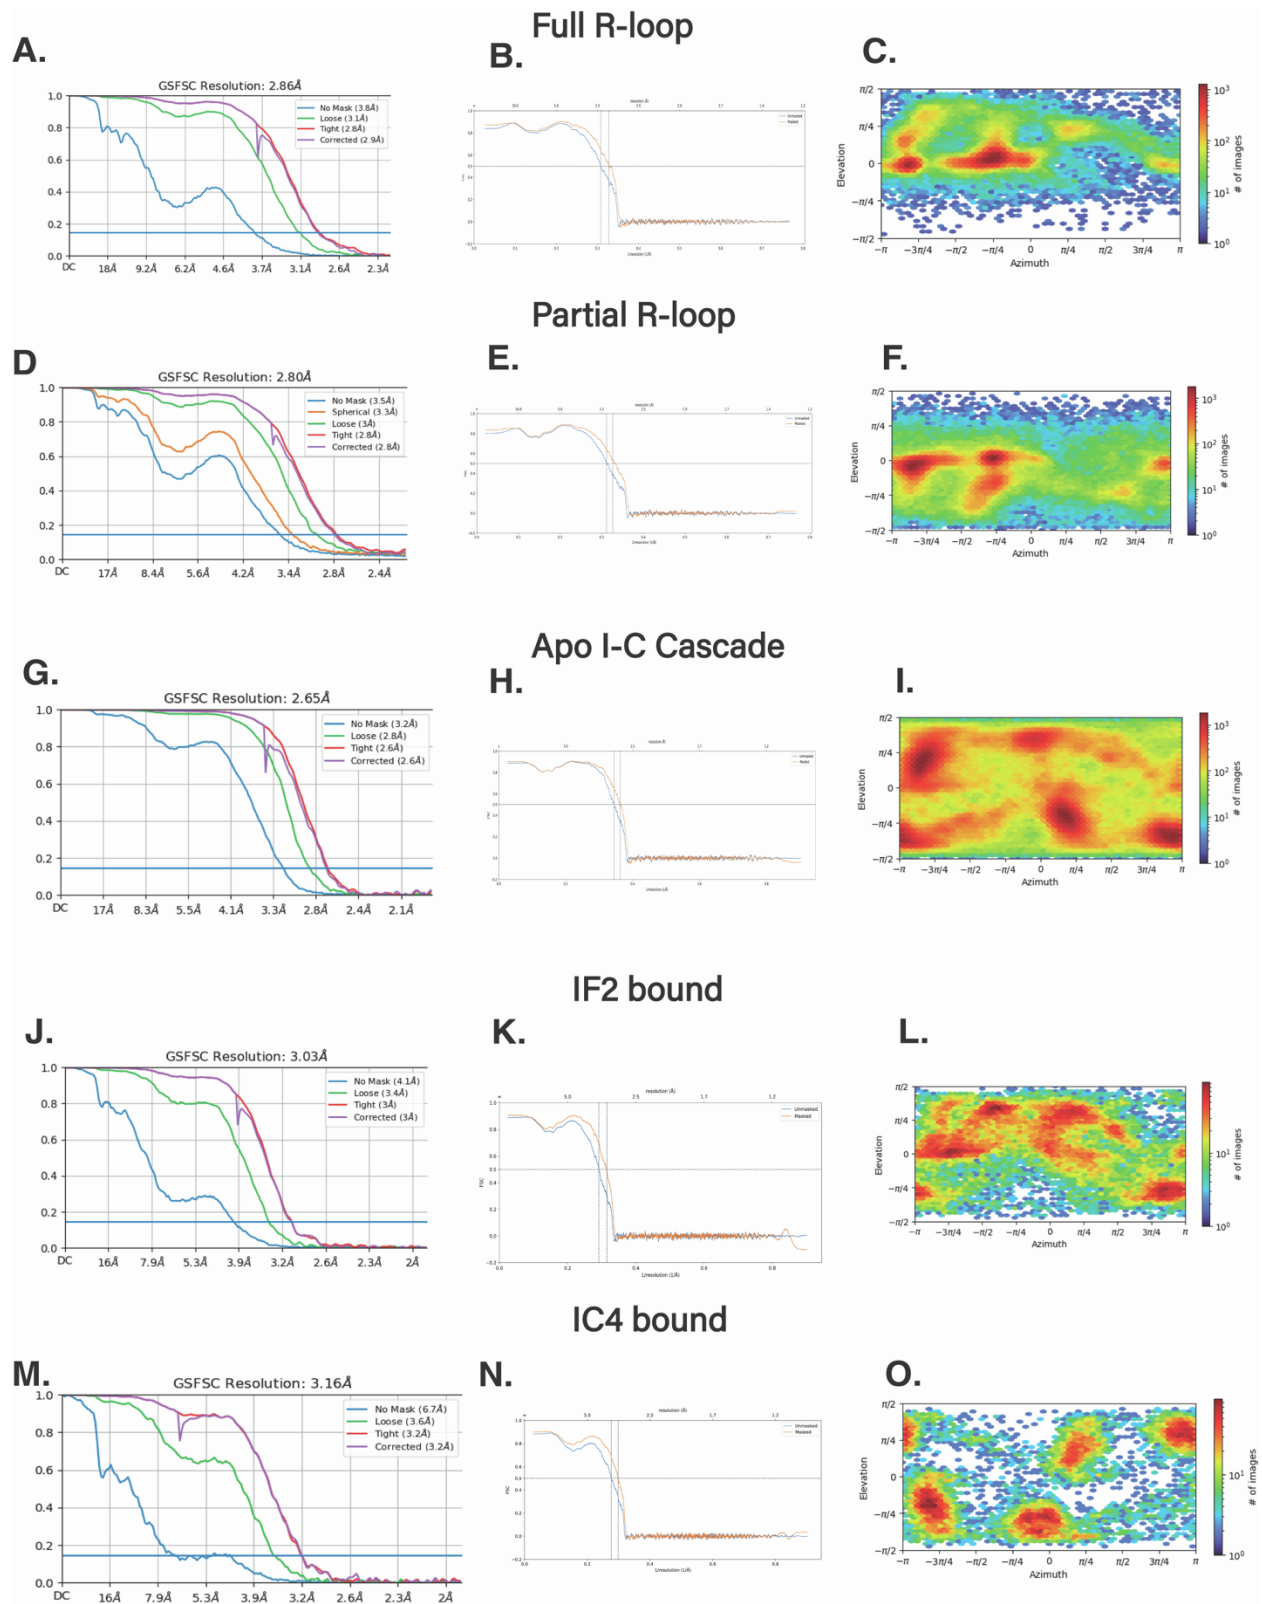

**Figure S2. Related to Figure 1. Cryo-EM data analysis. A.** Gold standard Fourier Shell Correlation (FSC) curves for type I-C Cascade bound to dsDNA complex. **B.** Map-to-

model FSC for type I-C Cascade bound to dsDNA complex. **C.** Euler plot for type I-C Cascade bound to dsDNA complex **D.** Gold standard Fourier Shell Correlation (FSC) curves for type I-C Cascade partial R-loop complex. **E** Map-to-model FSC for type I-C Cascade partial R-loop complex **F.** Euler plot for type I-C Cascade partial R-loop. **G.** Gold standard Fourier Shell Correlation (FSC) curves for unbound type I-C Cascade. **H.** Map-to-model FSC for type I-C Cascade bound to unbound type I-C Cascade. **I.** Euler plot for unbound type I-C Cascade. **J.** Gold standard Fourier Shell Correlation (FSC) curves for type I-C Cascade bound to AcrIF2. **K.** Map-to-model FSC for type I-C Cascade for type I-C Cascade bound to AcrIF2. **L.** Euler plot for type I-C Cascade bound to AcrIF2. **M.** Gold standard Fourier Shell Correlation (FSC) curves for type I-C Cascade bound to AcrIC4. **N.** Map-to-model FSC for type I-C Cascade for type I-C Cascade bound to AcrIC4. **O.** Euler plot for type I-C Cascade bound to AcrIC4.



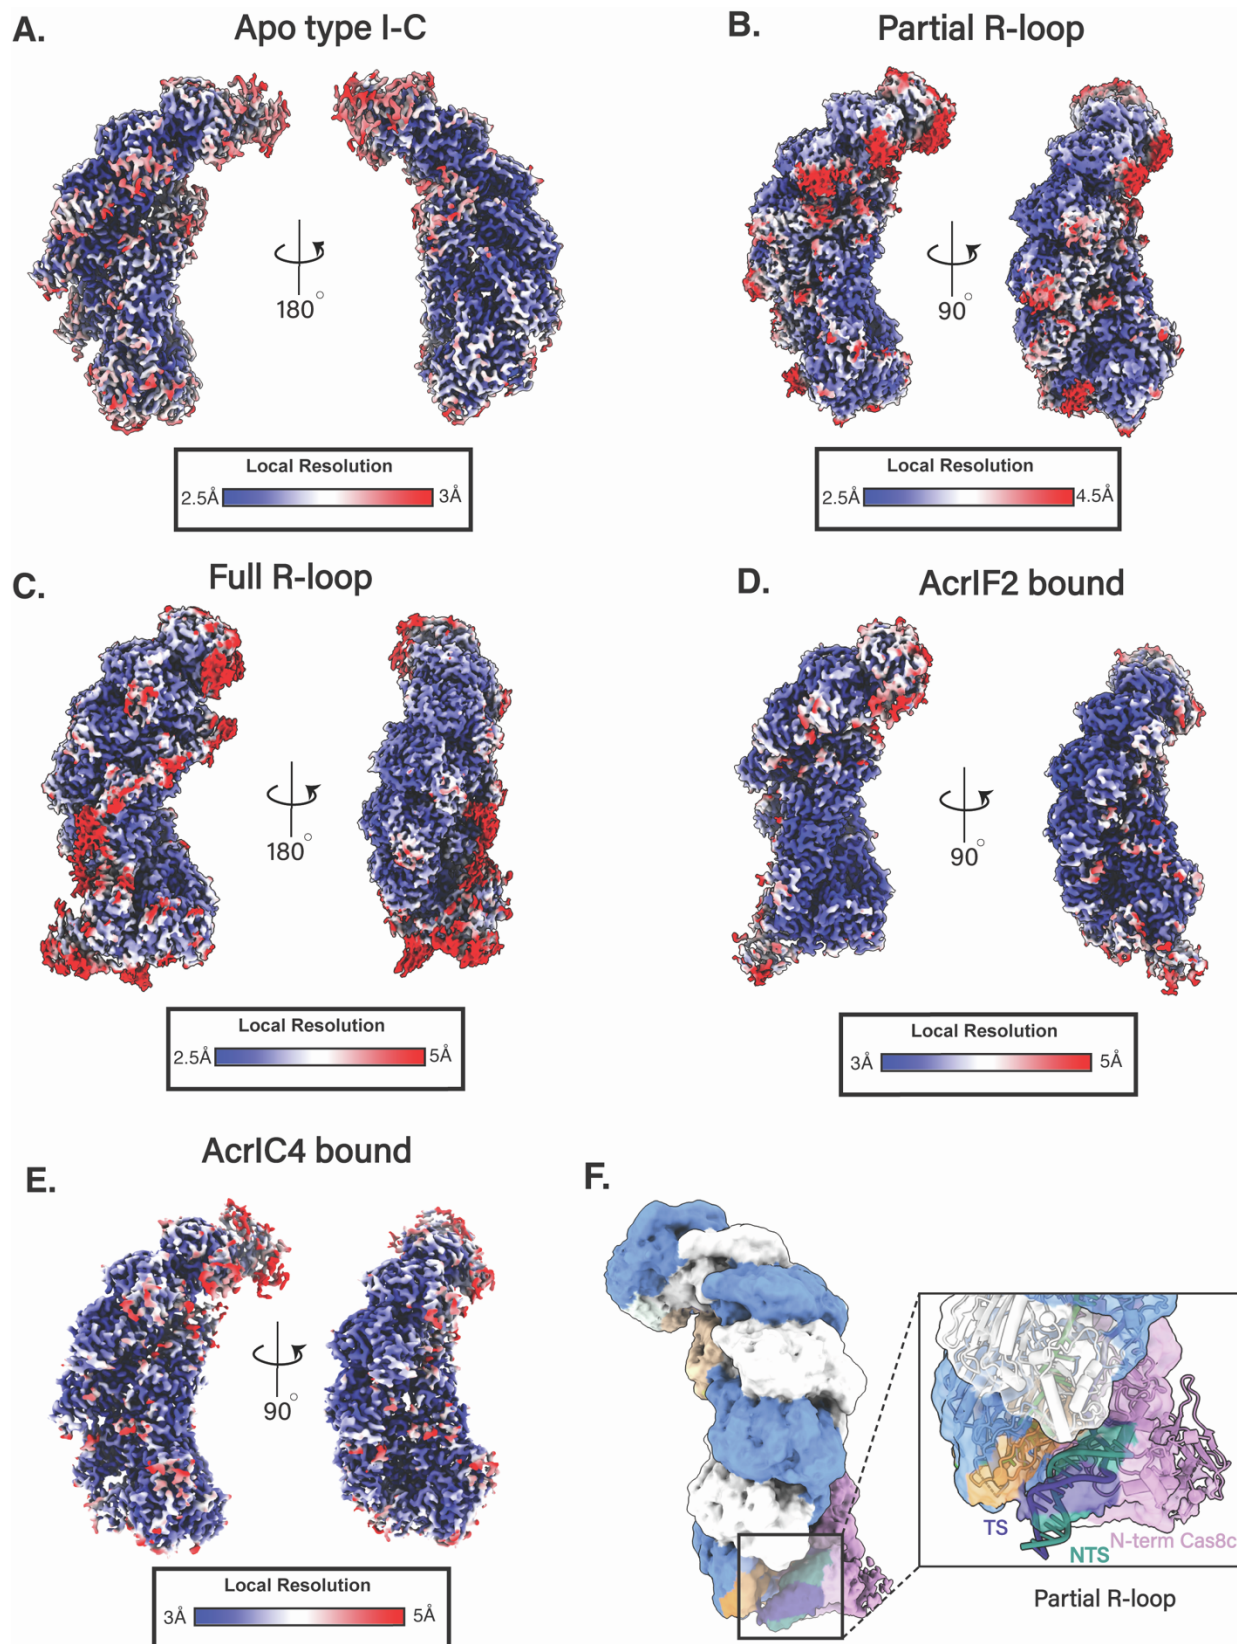

**Figure S3. Local resolution analysis. Related to Figures 1-5. A-E.** Sharpened maps colored according to local resolution. **F.** Cryo-EM density of partial R-loop structure.

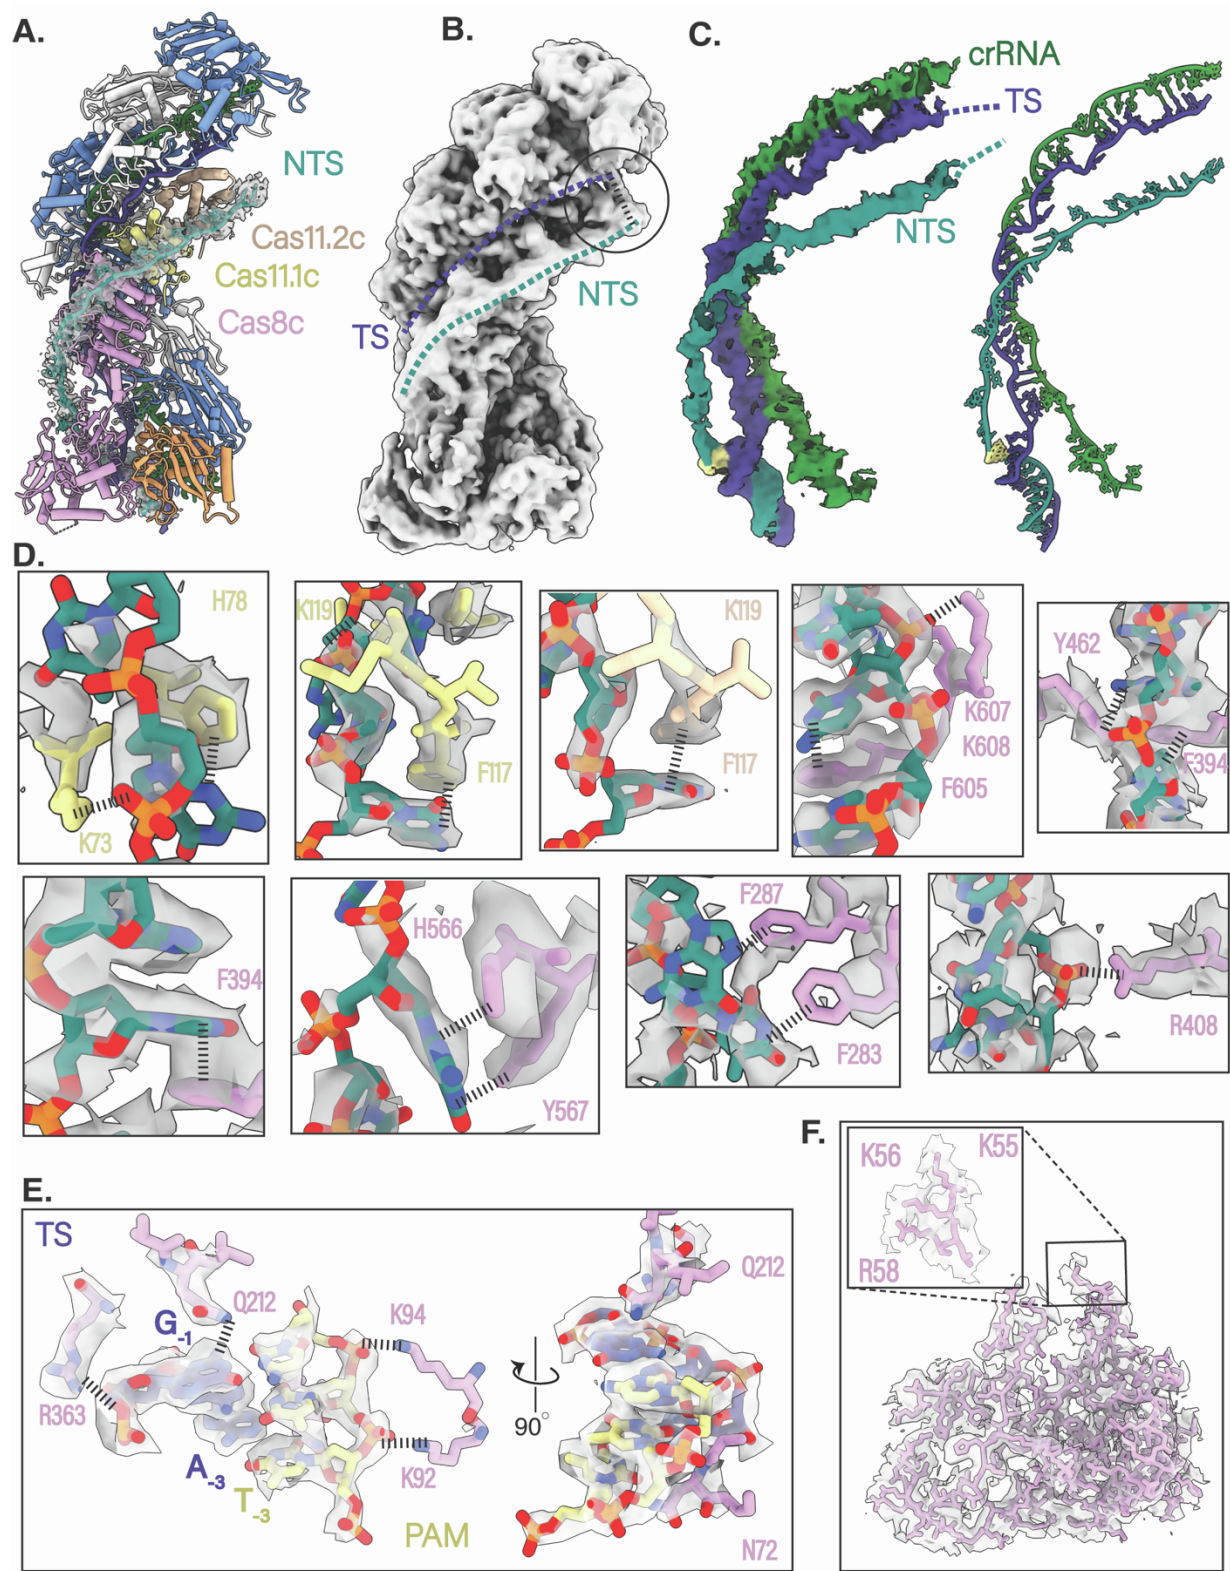

**Figure S4. Related to Figures 1-3. Representative cryo-EM densities. A.** NTS. **B.** NTS and TS reannealing at the top of the R-loop. **C.** NTS, TS, and crRNA densities and

corresponding model **D**. NTS aromatic clamps and positively charged backbone stabilizing residues. **E**. PAM-recognition site **F**. Cas8c N-term.



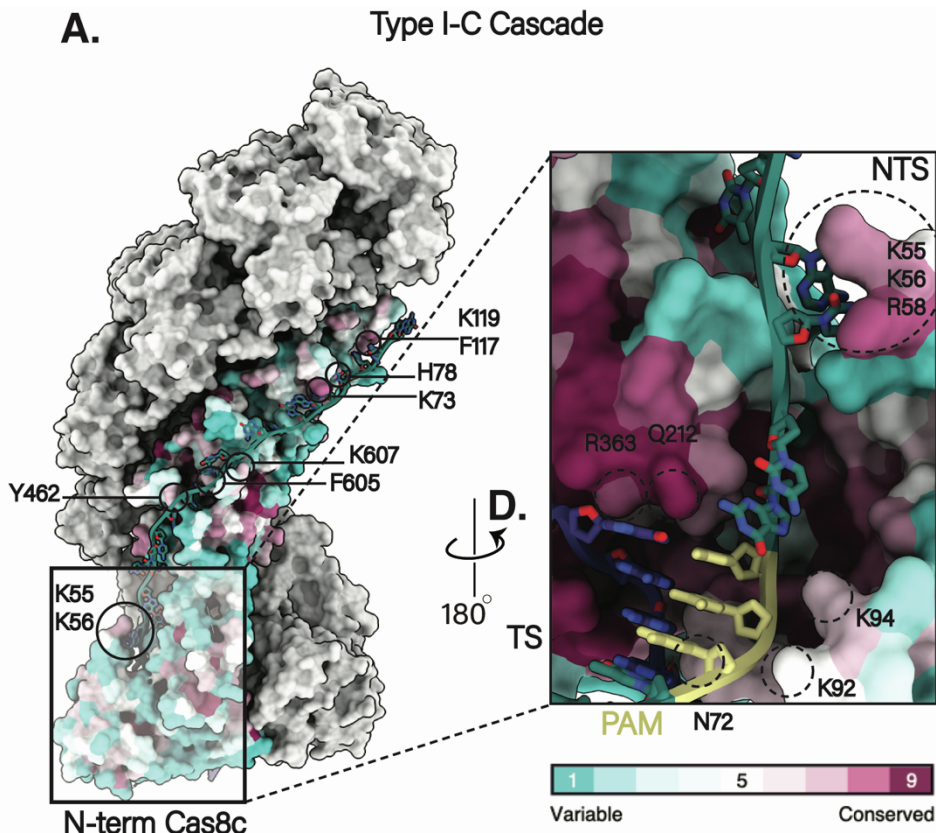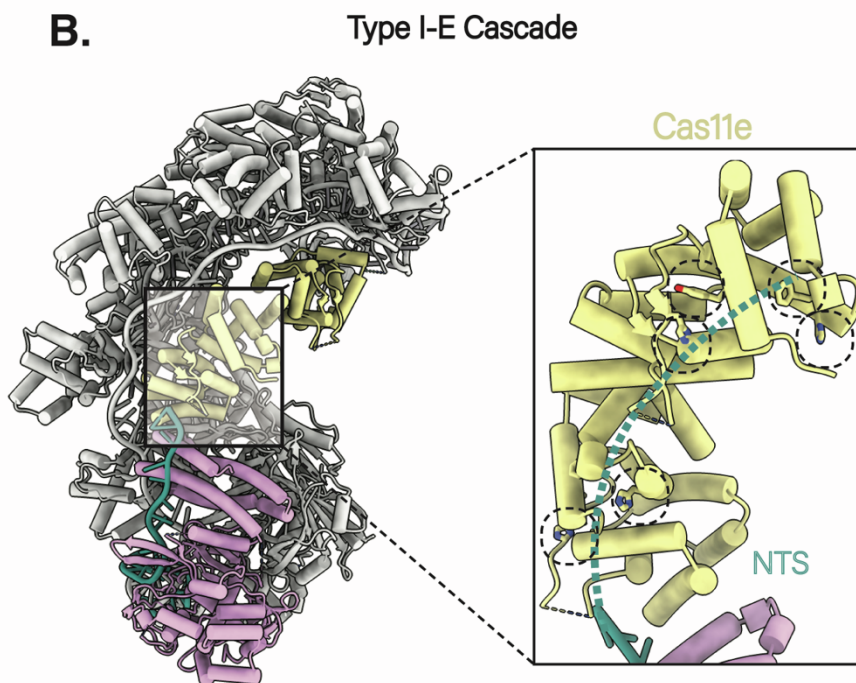

**Figure S5. Related to Figure 2. Conservation of NTS aromatic clamps across type I Cascades. A.** Aromatic and positively charged NTS stabilizing residues, and residues involved in PAM recognition (inset) are highly conserved across type I Cascades. **B.**

Multiple aromatic residues positioned along the putative NTS path (green) of type I-E Cascade [S1].

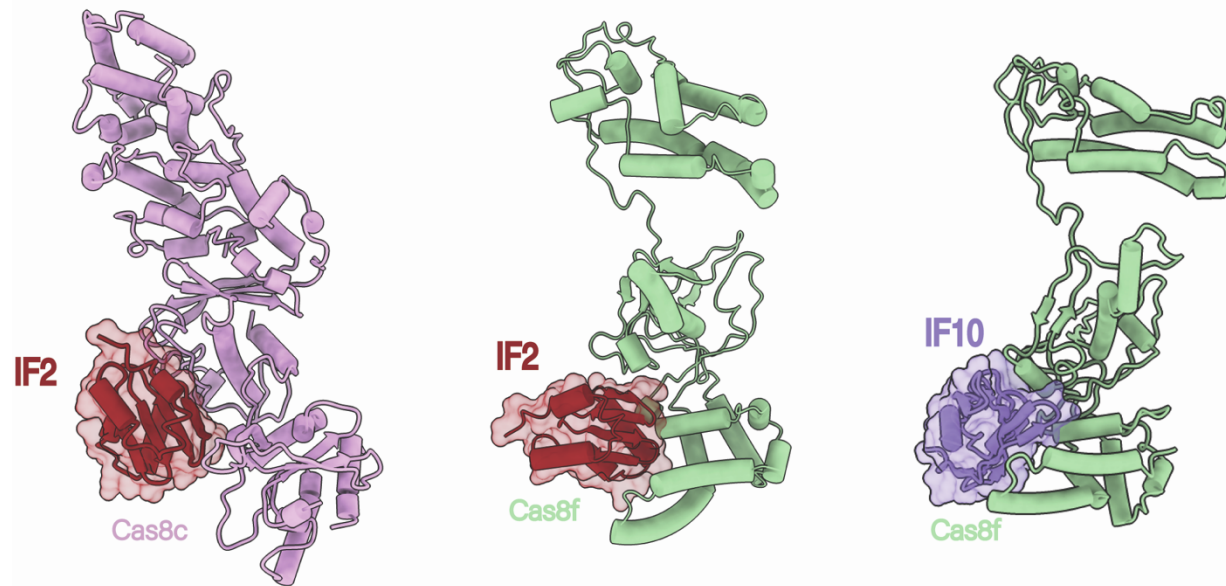

**Figure S6. Related to Figures 4-5. Differences in positioning of Cas8 PAM blocking anti-CRISPRs.** AcrIF2 inhibits both Cas8c and Cas8f through the same interface and at the same PAM site as AcrIF10, but at different orientations [S2, S3].

**Table S1. Related to Figure 1. Model Statistics for the type I-C Cascade structures.**

|                                                     | Type I-C apo model unbound | Type I-C Cascade full R-loop | Type I-C Cascade partial R-loop | Type I-C Cascade bound to AcrIF2 | Type I-C Cascade bound to AcrIC4 |
|-----------------------------------------------------|----------------------------|------------------------------|---------------------------------|----------------------------------|----------------------------------|
| <b>Data collection and processing</b>               |                            |                              |                                 |                                  |                                  |
| Voltage (kV)                                        | 200                        | 300                          | 300                             | 200                              | 200                              |
| Electron exposure (e <sup>-</sup> /Å <sup>2</sup> ) | 40.5                       | 80                           | 80                              | 40.5                             | 40.5                             |
| Defocus range (μm)                                  | 1.5 to 2.5                 | 1.2 to 2.2                   | 1.2 to 2.2                      | 1.5 to 2.5                       | 1.5 to 2.5                       |
| Pixel size (Å)                                      | 0.94                       | 1.1                          | 1.1                             | 0.94                             | 0.94                             |
| Symmetry imposed                                    | C1                         | C1                           | C1                              | C1                               | C1                               |
| Initial particle images (no.)                       | 2 million                  | 1.2 million                  | 1.2 million                     | 160,716                          | 128,780                          |
| Final particle images (no.)                         | 73,220                     | 96,964                       | 174,004                         | 21,625                           | 21,651                           |
| Map resolution (Å)<br>FSC threshold                 | 2.84<br>0.143              | 2.86<br>0.143                | 2.80<br>0.143                   | 3.1<br>0.143                     | 3.1<br>0.143                     |
| Map resolution range (Å)                            | N/A                        | N/A                          | N/A                             | N/A                              | N/A                              |
| <b>Refinement</b>                                   |                            |                              |                                 |                                  |                                  |
| Initial pdb model used                              | 7KHA                       | 7KHA                         | 7KHA                            | 7KHA<br>5UZ9                     | 7KHA                             |
| Model resolution (Å)<br>FSC threshold               | 2.8<br>0.5                 | 3.1<br>0.5                   | 3.1<br>0.5                      | 3.2<br>0.5                       | 3.4<br>0.5                       |
| Model resolution range (Å)                          | N/A                        | N/A                          | N/A                             | N/A                              | N/A                              |
| Map sharpening <i>B</i> factor (Å <sup>2</sup> )    | 89.3                       | 120.3                        | 127.1                           | 60.0                             | 47.5                             |
| Model composition                                   |                            |                              |                                 |                                  |                                  |
| Non-hydrogen atoms                                  | N/A                        | N/A                          | N/A                             | N/A                              | N/A                              |
| Protein residues                                    | 2855                       | 2975                         | 2855                            | 3082                             | 2912                             |
| Ligands                                             | 48                         | 135                          | 64                              | 48                               | 45                               |
| <i>B</i> factors (Å <sup>2</sup> )                  |                            |                              |                                 |                                  |                                  |
| Protein                                             | 00.00/101.8<br>2/37.11     | 00.00/136.69<br>/53.34       | 00.00/122.38<br>/50.69          | 16.24/186.47<br>76.56            | 31.17/224.86<br>/92.39           |
| Nucleotide                                          | 00.0082.89/<br>28.56       | 12.60/223.93<br>/96.73       | 00.00/133.42<br>/55.56          | 25.94/152.35<br>/65.22           | 46.22/141.66<br>/82.27           |
| R.m.s. deviations                                   |                            |                              |                                 |                                  |                                  |
| Bond lengths (Å)                                    | .0005                      | .003                         | .003                            | 0.009                            | 0.003                            |
| Bond angles (°)                                     | .706                       | .623                         | .682                            | 0.921                            | 0.646                            |
| <b>Validation</b>                                   |                            |                              |                                 |                                  |                                  |
| MolProbity score                                    | 1.68                       | 1.56                         | 1.71                            | 1.61                             | 1.75                             |
| Clashscore                                          | 4.92                       | 4.06                         | 6.01                            | 6.73                             | 9.49                             |
| Poor rotamers (%)                                   | 1.71                       | 1.69                         | 1.25                            | 0.27                             | 0.00                             |
| Ramachandran plot                                   |                            |                              |                                 |                                  |                                  |
| Favored (%)                                         | 96.33                      | 96.82                        | 95.54                           | 96.37                            | 96.30                            |
| Allowed (%)                                         | 3.67                       | 3.18                         | 4.46                            | 3.63                             | 3.63                             |
| Disallowed (%)                                      | 0.00                       | 0.00                         | 0.00                            | 0.00                             | 0.07                             |

**Table S2. Related to Figure 1. Plasmids used in this study.**

| Plasmid | Description                                                                                                   | Reference             |
|---------|---------------------------------------------------------------------------------------------------------------|-----------------------|
| #81185  | <i>D. vulgaris</i> type I-C Cascade for purification and cryo-EM studies                                      | Addgene               |
| #81186  | <i>D. vulgaris</i> type I-C crRNA for co-expression with Cascade                                              | Addgene               |
| #89234  | AcrIF2 for purification and cryo-EM studies                                                                   | Addgene               |
| pIF199  | Backbone used for AcrIF2 and AcrIC4 for <i>in vivo</i> interference assay                                     | Dillard et al [S4]    |
| pIF412  | Backbone used for dsDNA target for <i>in vivo</i> interference assay                                          | Dillard et al [S4]    |
| pIF385  | Backbone used for Cascade-Cas3 for <i>in vivo</i> interference                                                | Dillard et al [S4]    |
| #48313  | Backbone vector used for AcrIC4 for <i>in vivo</i> interference                                               | Addgene               |
| pRO01   | Type I-C Cascade Cas8c mutant Q212A for purification and EMSA                                                 | This study            |
| pRO02   | Type I-C Cascade Cas8c mutant N72A for purification and EMSA                                                  | This study            |
| pRO03   | AcrIC4 for purification and cryo-EM studies                                                                   | This study            |
| #196399 | pCDF-Duet1 vector with target sequence and 5' PAM for <i>in vivo</i> interference                             | Addgene<br>This study |
| #196400 | pBAD vector with IC cascade and cas3 for <i>in vivo</i> interference                                          | Addgene<br>This study |
| #196402 | pET28b-Duet1 vector with Acr IF2 for <i>in vivo</i> interference                                              | Addgene<br>This study |
| #196403 | pET28b-Duet1 vector with Acr-IC4 for <i>in vivo</i> interference                                              | Addgene<br>This study |
| pDR009  | pBAD vector with IC Cascade and Cas3 with Cas8c N72A mutation for <i>in vivo</i> interference assay           | This study            |
| pDR010  | pBAD vector with IC Cascade and Cas3 with Cas8c Q212A mutation for <i>in vivo</i> interference assay          | This study            |
| pDR011  | pBAD vector with IC Cascade and Cas3 with Cas8c Aromatic mutants for <i>in vivo</i> interference assay        | This study            |
| pDR012  | pBAD vector with IC Cascade and Cas3 with Cas8c Positive mutants for <i>in vivo</i> interference assay        | This study            |
| pDR013  | pBAD vector with IC Cascade and Cas3 with Cas8c R363A/K94A/K92A mutants for <i>in vivo</i> interference assay | This study            |

**Table S3. Related to Figures 1.** Oligonucleotides used in this study.

| <b>Primer</b>                                           | <b>Sequence (5' to 3')</b>                                                                    | <b>Reference</b>           |
|---------------------------------------------------------|-----------------------------------------------------------------------------------------------|----------------------------|
| roO1<br>Cas8c Q212A F                                   | ggctGTTGCCTCGATAGTGTCTTTAACAACAC                                                              | This study                 |
| roO2<br>Cas8c Q212A R                                   | gctgcACCGCGAACGCCGTCTCG                                                                       | This study                 |
| roO2<br>Cas8c N72A F                                    | gggcATCAAACCGAACTTCCTG                                                                        | This study                 |
| roO3<br>Cas8c N72A R                                    | gccccCTTCTTTTCCGCGATAGG                                                                       | This study                 |
| roO4<br>AcrIC4 F                                        | TACTTCCAATCCAATGCAATGGACAATAAGATTACTCT<br>GCT                                                 | This study                 |
| roO5<br>AcrIC4 R                                        | TTATCCACTTCCAATGTTATTAAGTTTCATCTCCACGCC<br>A                                                  | This study                 |
| TS for cryo-EM<br>experiments                           | AGCAGACTGGAGGAGTTTTCGCCATGCTCAGGCTGGC<br>G<br>AGTGCGCCACTCATCAAGCCATGTGGGCTGTCAAAT            | Hochstrasser et al<br>[S5] |
| NTS for cryo-EM<br>experiments and<br>EMSA              | AGCAGACTGGAGGAGTTTTCGCCATGCTCAGGCTGGC<br>G<br>AGTGCGCCACTCATCAAGCCATGTGGGCTGTCAAAT            | Hochstrasser et al<br>[S5] |
| TS for EMSA                                             | 5' FAM-<br>AGCAGACTGGAGGAGTTTTCGCCATGCTCAGGCTGGC<br>G<br>AGTGCGCCACTCATCAAGCCATGTGGGCTGTCAAAT | Hochstrasser et al<br>[S5] |
| dr001<br>pCDF-Duet1 vector<br>with target<br>sequence F | TTCGCCATGCTCAGGCTGGCGAGTGCGCCACTCATCA<br>ACCTGTAGAAATAA<br>TTTTGTTAACTTTAAT                   | This study                 |
| dr002<br>pCDF-Duet1 vector<br>with target<br>sequence R | GGAATTGTTATCCGCTCAC                                                                           | This study                 |
| iso020<br>pBAD vector with<br>IC cascade-Cas3 F         | GTTCGAAAAGTAAGAATTCGAAGCTTGG                                                                  | This study                 |
| iso021<br>pBAD vector with<br>IC cascade-Cas3 R         | GCTGCAGATCTCGAGCTCGG                                                                          | This study                 |
| iso063<br>pBAD vector with<br>IC cascade-Cas3 F         | CCATGGATCCGAGCTCGAGATCTGCAGCATGACACAT<br>GGGGCTG                                              | This study                 |
| iso064                                                  | CCAAGCTTCGAATTCTTACTTTTCGAACCTACAGCATCT<br>CTTTGACCTC                                         | This study                 |



|                                                   |                                                                   |            |
|---------------------------------------------------|-------------------------------------------------------------------|------------|
| pBAD vector with IC cascade-Cas3 R                |                                                                   |            |
| dr007<br>pET28b-Duet1<br>vector with Acr IF2<br>F | GAAATAATTTTGTTTAACTTTAAGAAGGAGATATACCAT<br>GATGATCGCGCAACAGCATAA  | This study |
| dr008<br>pET28b-Duet1<br>vector with Acr IF2<br>R | TACAGTATCCTTATGCTGTTGCGCGATCATCATGGTATA<br>TCTCCTTCTTAAAGTTAAACAA | This study |
| dr009<br>pET28b-Duet1<br>vector with Acr IF2<br>F | GAACGCCTGCTGGAGTCCGTAGAGGAGGAGCACCACC<br>ACCACCACCA               | This study |
| dr010<br>pET28b-Duet1<br>vector with Acr IF2<br>R | CTTTGTTAGCAGCCGGATCTCAGTGGTGGTGGTGGTG<br>GTGCTCCTCCTCTACGGACTCCA  | This study |
| dr011<br>pET28b-Duet1<br>vector with Acr IF2<br>F | TGAGATCCGGCTGCTAAC                                                | This study |
| dr012<br>pET28b-Duet1<br>vector with Acr IF2<br>R | CTCCTCCTCTACGGACTCC                                               | This study |
| dr013<br>pET28b-Duet1<br>vector with Acr-IC4<br>F | TTTTGTTAACTTTAAGAAGGAGATATACCATGGATAAC<br>AAAATCACACCTGCGGAC      | This study |
| dr014<br>pET28b-Duet1<br>vector with Acr-IC4<br>R | GGTGTGATTTTGTATCCATGGTATATCTCCTTCTTAAA<br>GTTAAACAAAATTATTTCTAG   | This study |
| dr015<br>pET28b-Duet1<br>vector with Acr-IC4<br>F | AAATATATTGAATGGCGTGGCGATGAAACGTGAGATCC<br>GGCTGCTAA               | This study |
| dr016<br>pET28b-Duet1<br>vector with Acr-IC4<br>R | CTTTCGGGCTTTGTTAGCAGCCGGATCTCACGTTTCAT<br>CGCCACGCCATTCAATATATTT  | This study |
| dr017<br>pBAD vector with<br>IC cascade-Cas3 F    | GTAGAGGTCAAAGAGATGCTGTAGGTTTGAATGGCAAA<br>CTTGGCTGCTACTTTTCGCTGAA | This study |
| dr018<br>pBAD vector with<br>IC cascade-Cas3 R    | GATGATGGTCGACGGCGCTATTGCTAACCAAACCTTCT<br>GGCTGCCAAACTTC          | This study |
| dr019<br>pBAD vector with<br>IC cascade-Cas3 F    | GAAGTTTGGCAGCCAGAAGGTTTGGTTAGCAATAGCG<br>CCGTCGACCATCATC          | This study |

|                                                                                    |                                                                  |            |
|------------------------------------------------------------------------------------|------------------------------------------------------------------|------------|
| dr020<br>pBAD vector with<br>IC cascade-Cas3 R                                     | TTCAGCGAAAGTAGCAGCCAAGTTTGCCATTCGAACCT<br>ACAGCATCTCTTTGACCTCTAC | This study |
| dr021<br>pBAD vector with<br>IC cascade-Cas3 to<br>anneal Cas8c<br>gBlock insert F | AGCCATGACCGCCATTGCC                                              | This study |
| dr022<br>pBAD vector with<br>IC cascade-Cas3 to<br>anneal Cas8c<br>gBlock insert R | GCCCTCACCTCCGGTGAC                                               | This study |
| dr023<br>Cas8c gBlocks<br>insert F                                                 | CCCGTCGCGCACGTCACCGGAGGTGAGGGCATGATCC<br>TGCAGGCATTGCATGG        | This study |
| dr024<br>Cas8c Aromatic<br>gBlock insert R                                         | TCGTATCTGTTGGCAATGGCGGTCATGGCTAGTTCTCC<br>TTGTTCTTCTTGGTGC GAA   | This study |
| dr025<br>Cas8c Positive<br>gBlock insert R                                         | TCGTATCTGTTGGCAATGGCGGTCATGGCTAGTTCTCC<br>TTGTTCCGCCGCG          | This study |
| dr026<br>Cas8c<br>R363A/K92A/K94A<br>gBlock insert R                               | TCGTATCTGTTGGCAATGGCGGTCATGGCTAGTTCTCC<br>TTGTTCTTCTTGGTGAAAAGGG | This study |

## References

- [S1] Hayes, R.P., Xiao, Y., Ding, F., van Erp, P.B.G., Rajashankar, K., Bailey, S., Wiedenheft, B., and Ke, A. (2016). Structural basis for promiscuous PAM recognition in type I-E Cascade from *E. coli*. *Nature* *530*, 499–503. 10.1038/nature16995.
- [S2] Chowdhury, S., Carter, J., Rollins, M.F., Golden, S.M., Jackson, R.N., Hoffmann, C., Nosaka, L., Bondy-Denomy, J., Maxwell, K.L., Davidson, A.R., et al. (2017). Structure Reveals Mechanisms of Viral Suppressors that Intercept a CRISPR RNA-Guided Surveillance Complex. *Cell* *169*, 47-57.e11. 10.1016/j.cell.2017.03.012.
- [S3] Guo, T.W., Bartesaghi, A., Yang, H., Falconieri, V., Rao, P., Merk, A., Eng, E.T., Raczkowski, A.M., Fox, T., Earl, L.A., et al. (2017). Cryo-EM Structures Reveal Mechanism and Inhibition of DNA Targeting by a CRISPR-Cas Surveillance Complex. *Cell* *171*, 414-426.e12. 10.1016/j.cell.2017.09.006.
- [S4] Dillard, K.E., Brown, M.W., Johnson, N.V., Xiao, Y., Dolan, A., Hernandez, E., Dahlhauser, S.D., Kim, Y., Myler, L.R., Anslyn, E.V., et al. (2018). Assembly and Translocation of a CRISPR-Cas Primed Acquisition Complex. *Cell* *175*, 934-946.e15. 10.1016/j.cell.2018.09.039.
- [S5] Hochstrasser, M.L., Taylor, D.W., Kornfeld, J.E., Nogales, E., and Doudna, J.A. (2016). DNA Targeting by a Minimal CRISPR RNA-Guided Cascade. *Mol. Cell* *63*, 840–851. 10.1016/j.molcel.2016.07.027.
